# Supplementary material for: Optimization of bacterial biorefineries for sustainable biodiesel production and flue gas reduction: a holistic approach to climate change mitigation and circular economy
Source: Royal Society of Chemistry journal article supplement (doi:10.1039/d4se01516a), 2025-01-01
Supplement: d4se01516a1.pdf [file d4se01516a1.pdf]

## Optimization of bacterial biorefinery for sustainable biodiesel production and flue gas reduction: A holistic approach to climate change mitigation and circular economy

Rachael J Barla<sup>1</sup>, Suresh Gupta<sup>1</sup>, Smita Raghuvanshi<sup>1\*</sup>

<sup>1</sup>Department of Chemical Engineering  
Birla Institute of Technology and Science (BITS), Pilani- 333031, Rajasthan, India.

\*Corresponding Author: Permanent Address: Department of Chemical Engineering, BITS  
PILANI, Pilani – 333031, Rajasthan, India, Tel.: +91-1596-515638 (O). Email -  
smita@pilani.bits-pilani.ac.in

### Supplementary

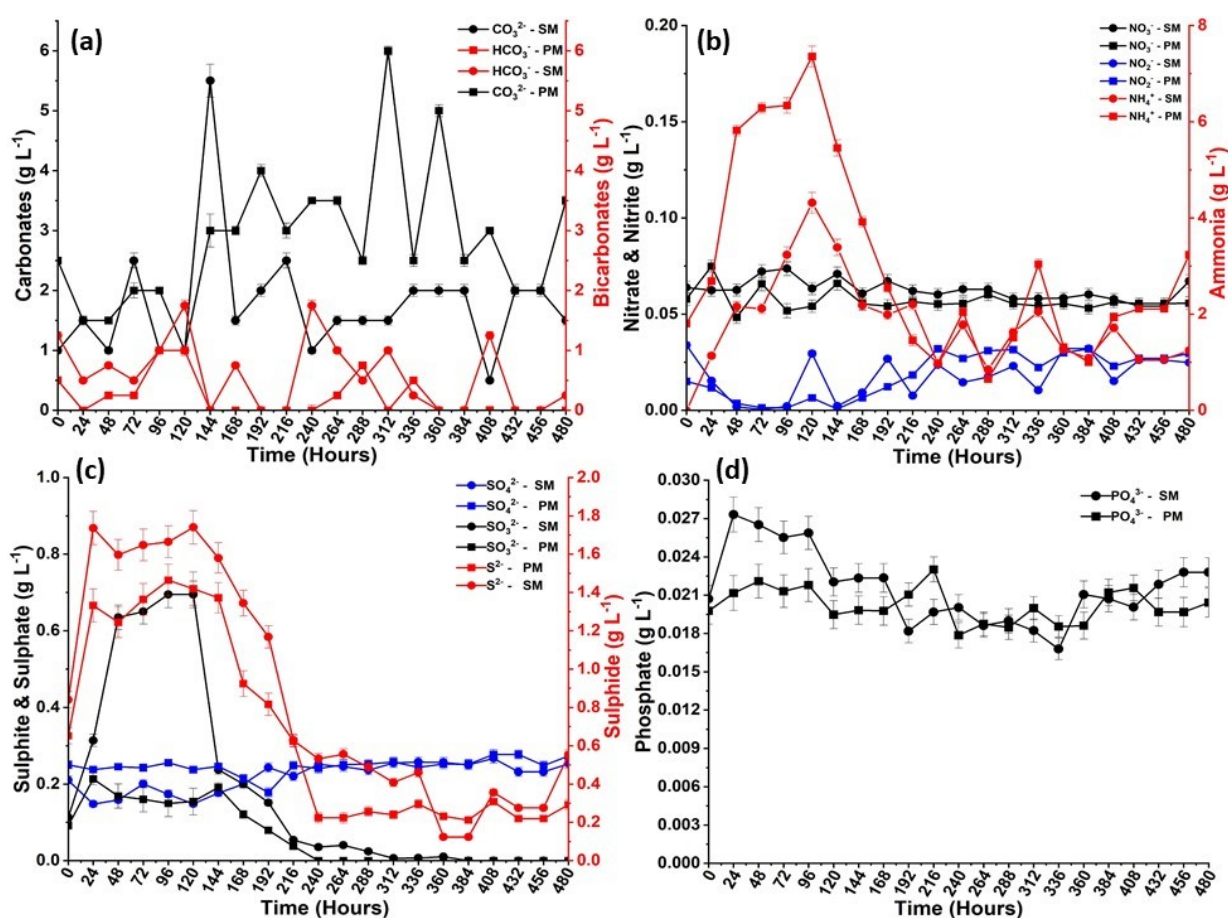

Fig. S1. Nutrient concentration in the media due to dissolved CO<sub>2</sub> (a) CO<sub>3</sub><sup>2-</sup> and HCO<sub>3</sub><sup>-</sup>; NO<sub>3</sub><sup>-</sup> (b) NH<sub>4</sub><sup>+</sup>, NO<sub>2</sub><sup>-</sup> and NO<sub>3</sub><sup>-</sup>; SO<sub>2</sub> (c) SO<sub>4</sub><sup>2-</sup>, SO<sub>3</sub><sup>2-</sup> and S<sup>2-</sup>; (d) PO<sub>4</sub><sup>3-</sup>

CARBON FIXATION PATHWAYS IN PROKARYOTES

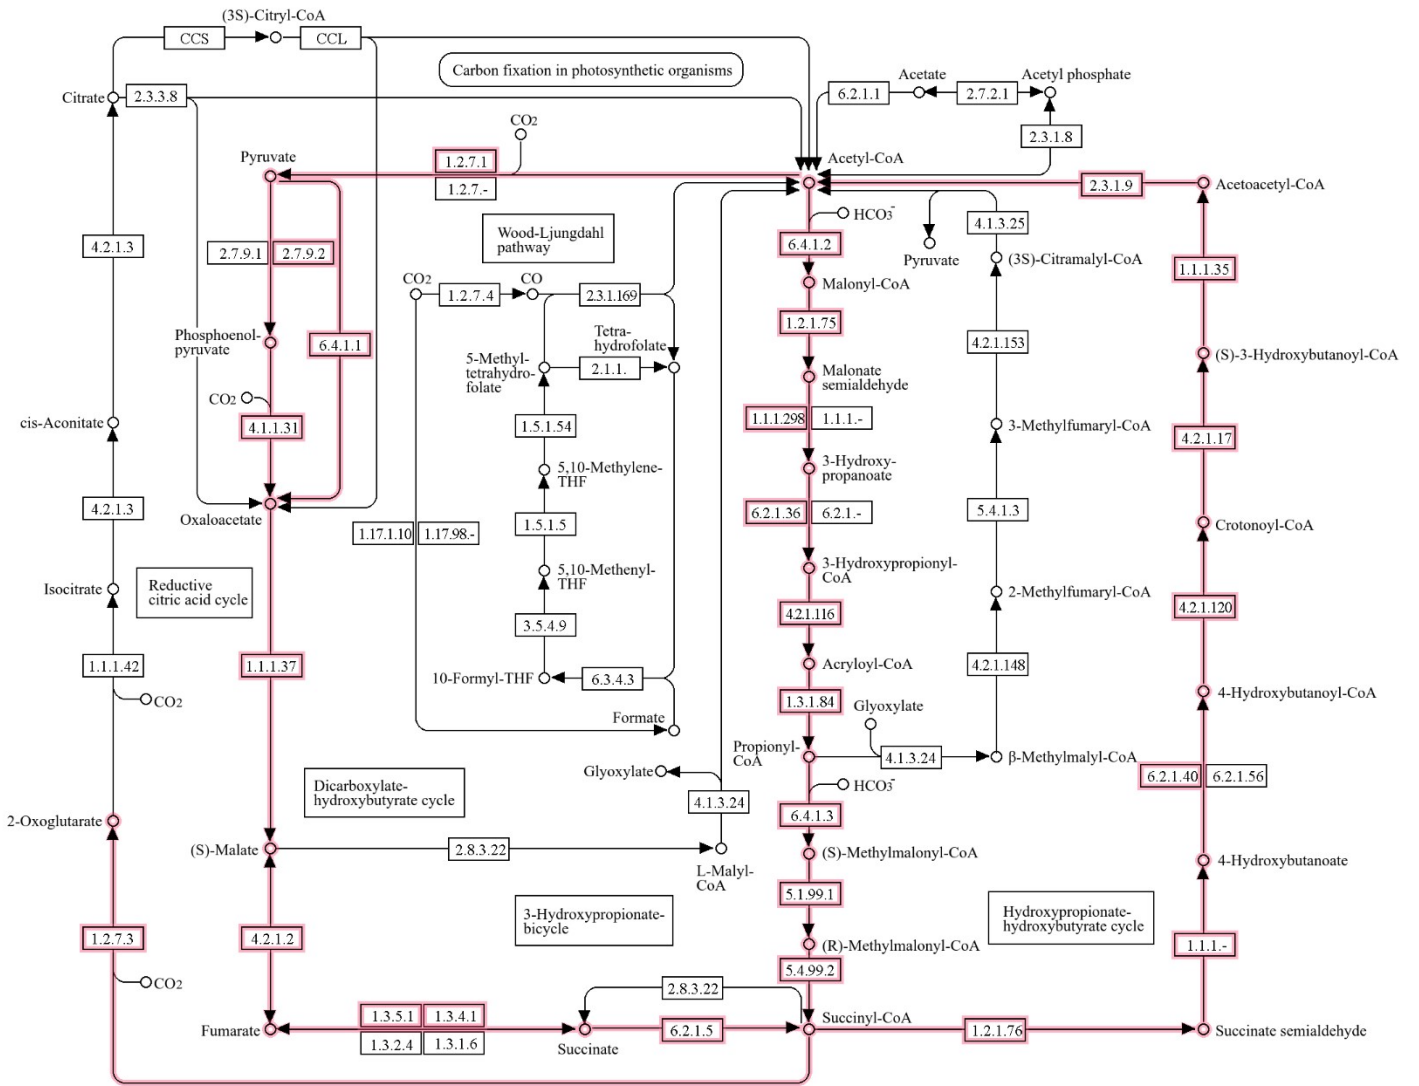

Fig. S2. The carbon fixation pathways followed by the bacteria for the CO<sub>2</sub> metabolism.

NITROGEN METABOLISM

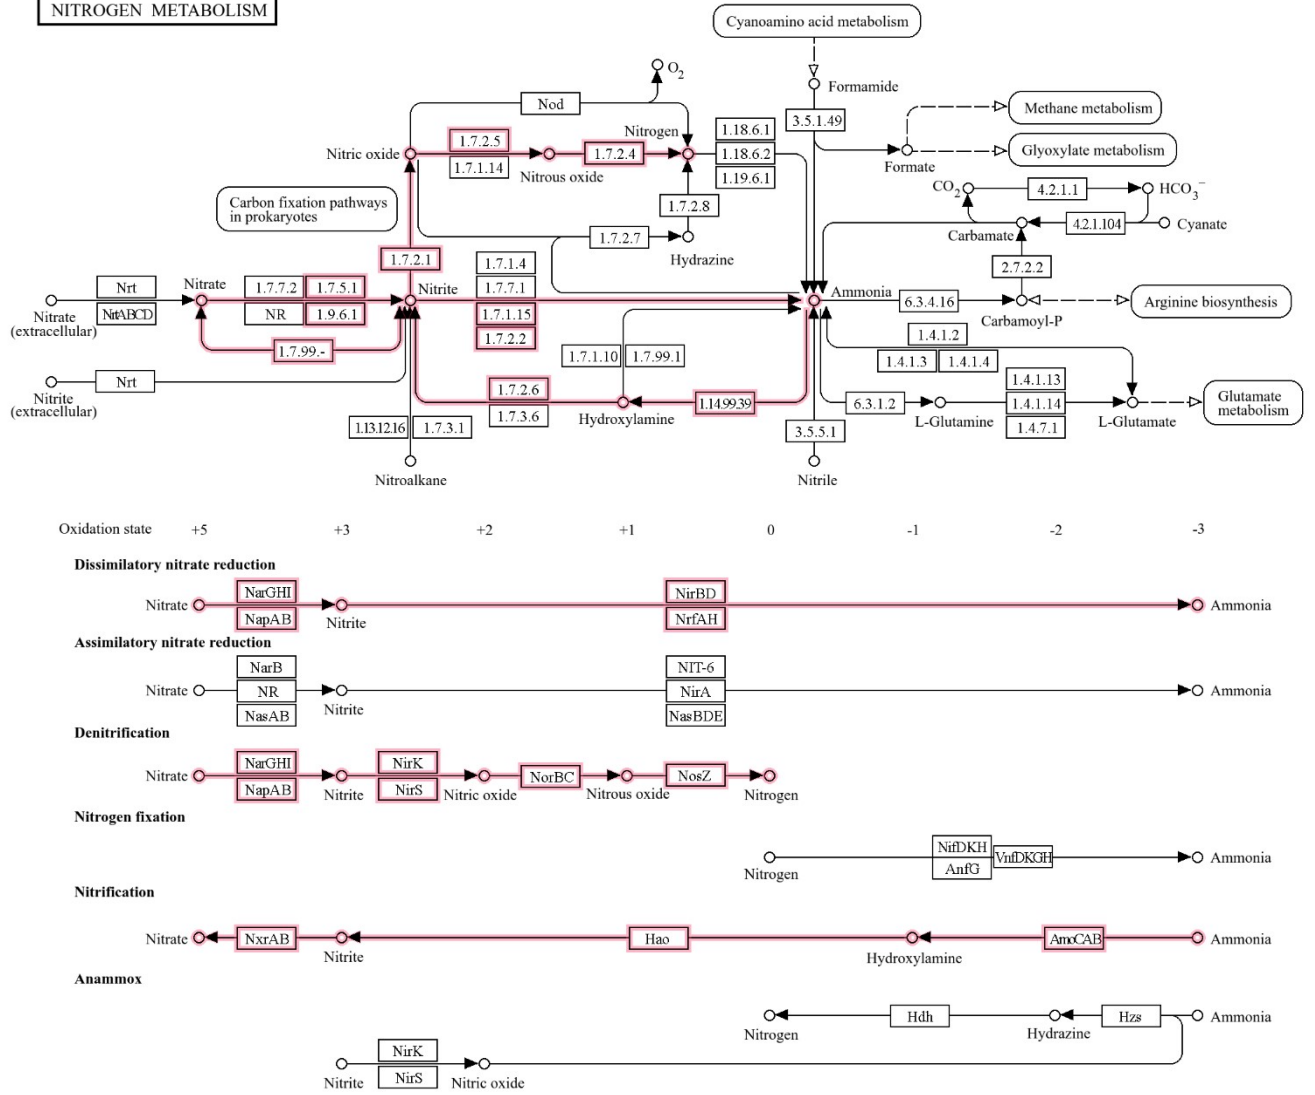

Fig. S3. The nitrogen fixation pathways followed by the bacteria for the NOx metabolism.



---

|                              |                                      |      |
|------------------------------|--------------------------------------|------|
| 0.096 US\$ /unit electricity | Pump (3 units/day)                   | 3.17 |
|                              | Reactor central unit (4.5 units/day) | 4.77 |
|                              | Flue gas analyzer (2 units/day)      | 2.11 |
| Workforce (per day)          | Labor charges                        | 2.17 |

---
